# Supplementary material
Source: HighWire-hosted journal article supplement (https://thorax.bmj.com/content/thoraxjnl-2020-216088)

## Supplementary figure 2

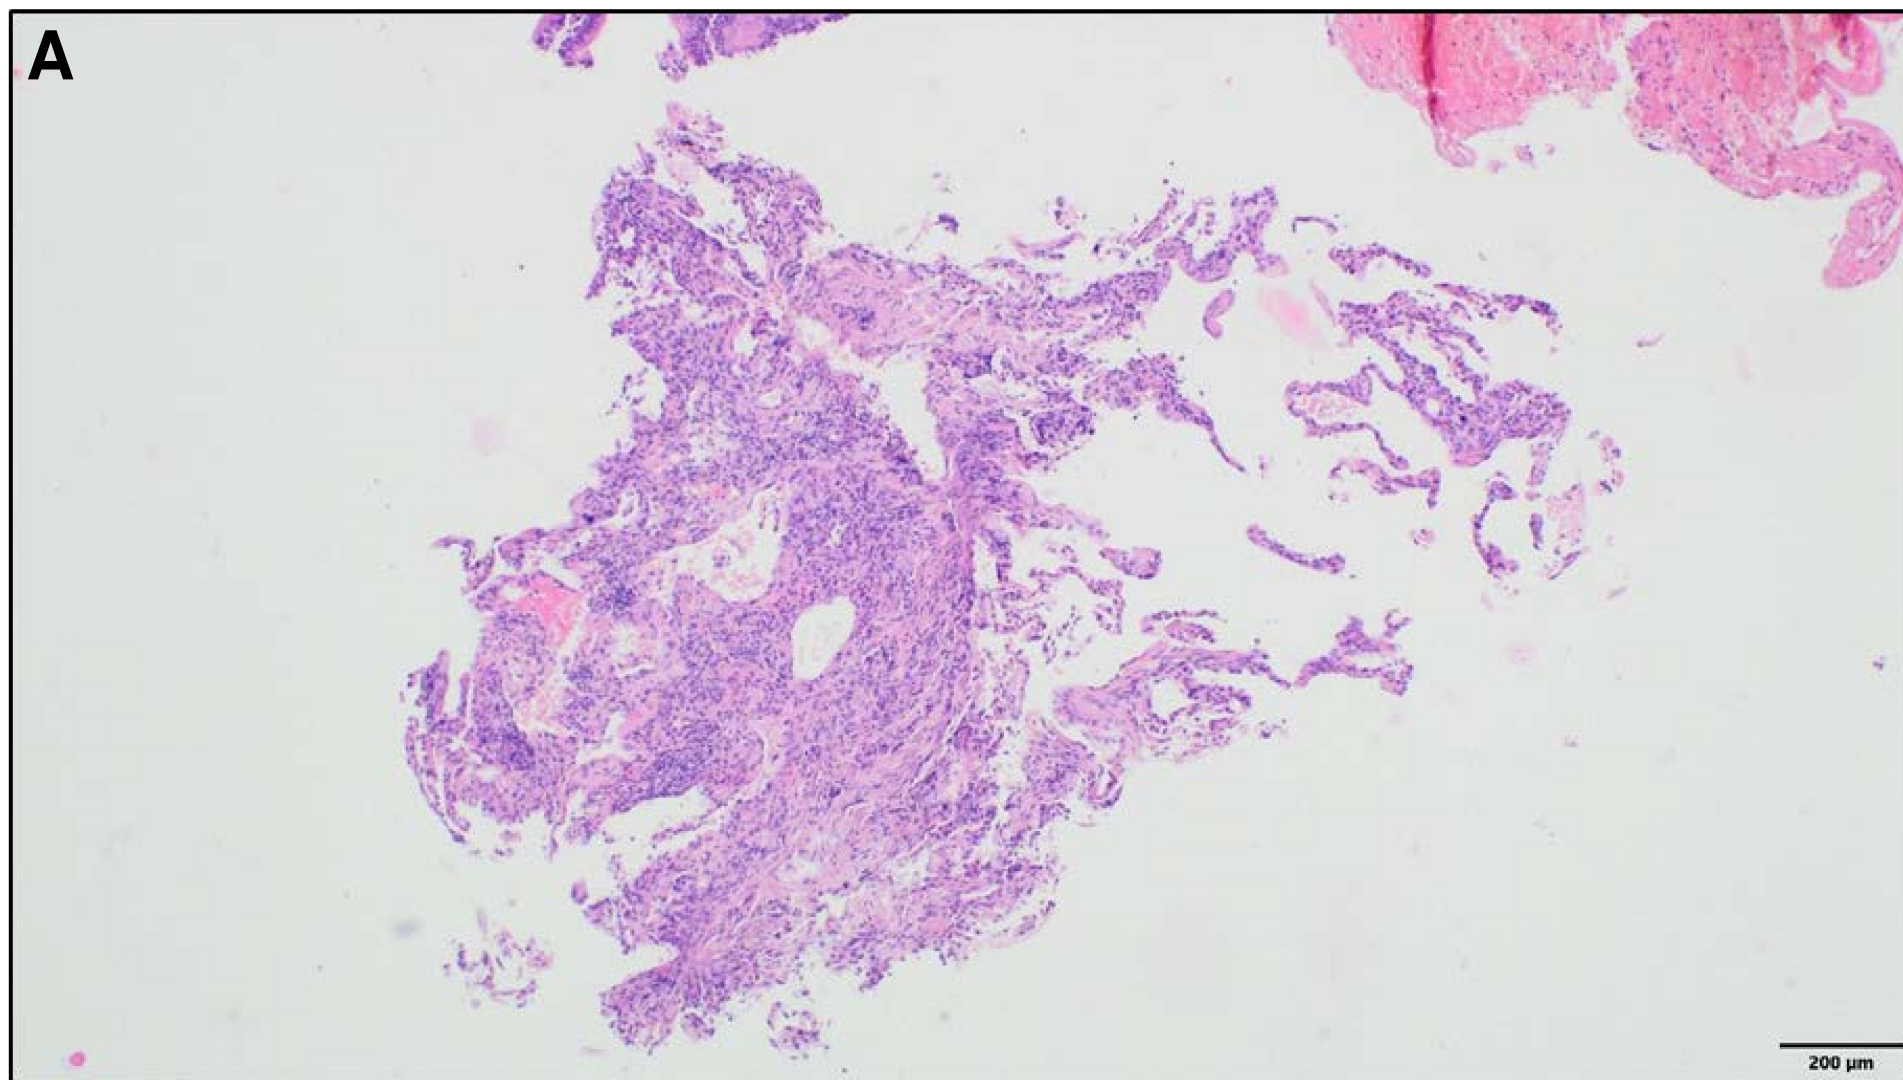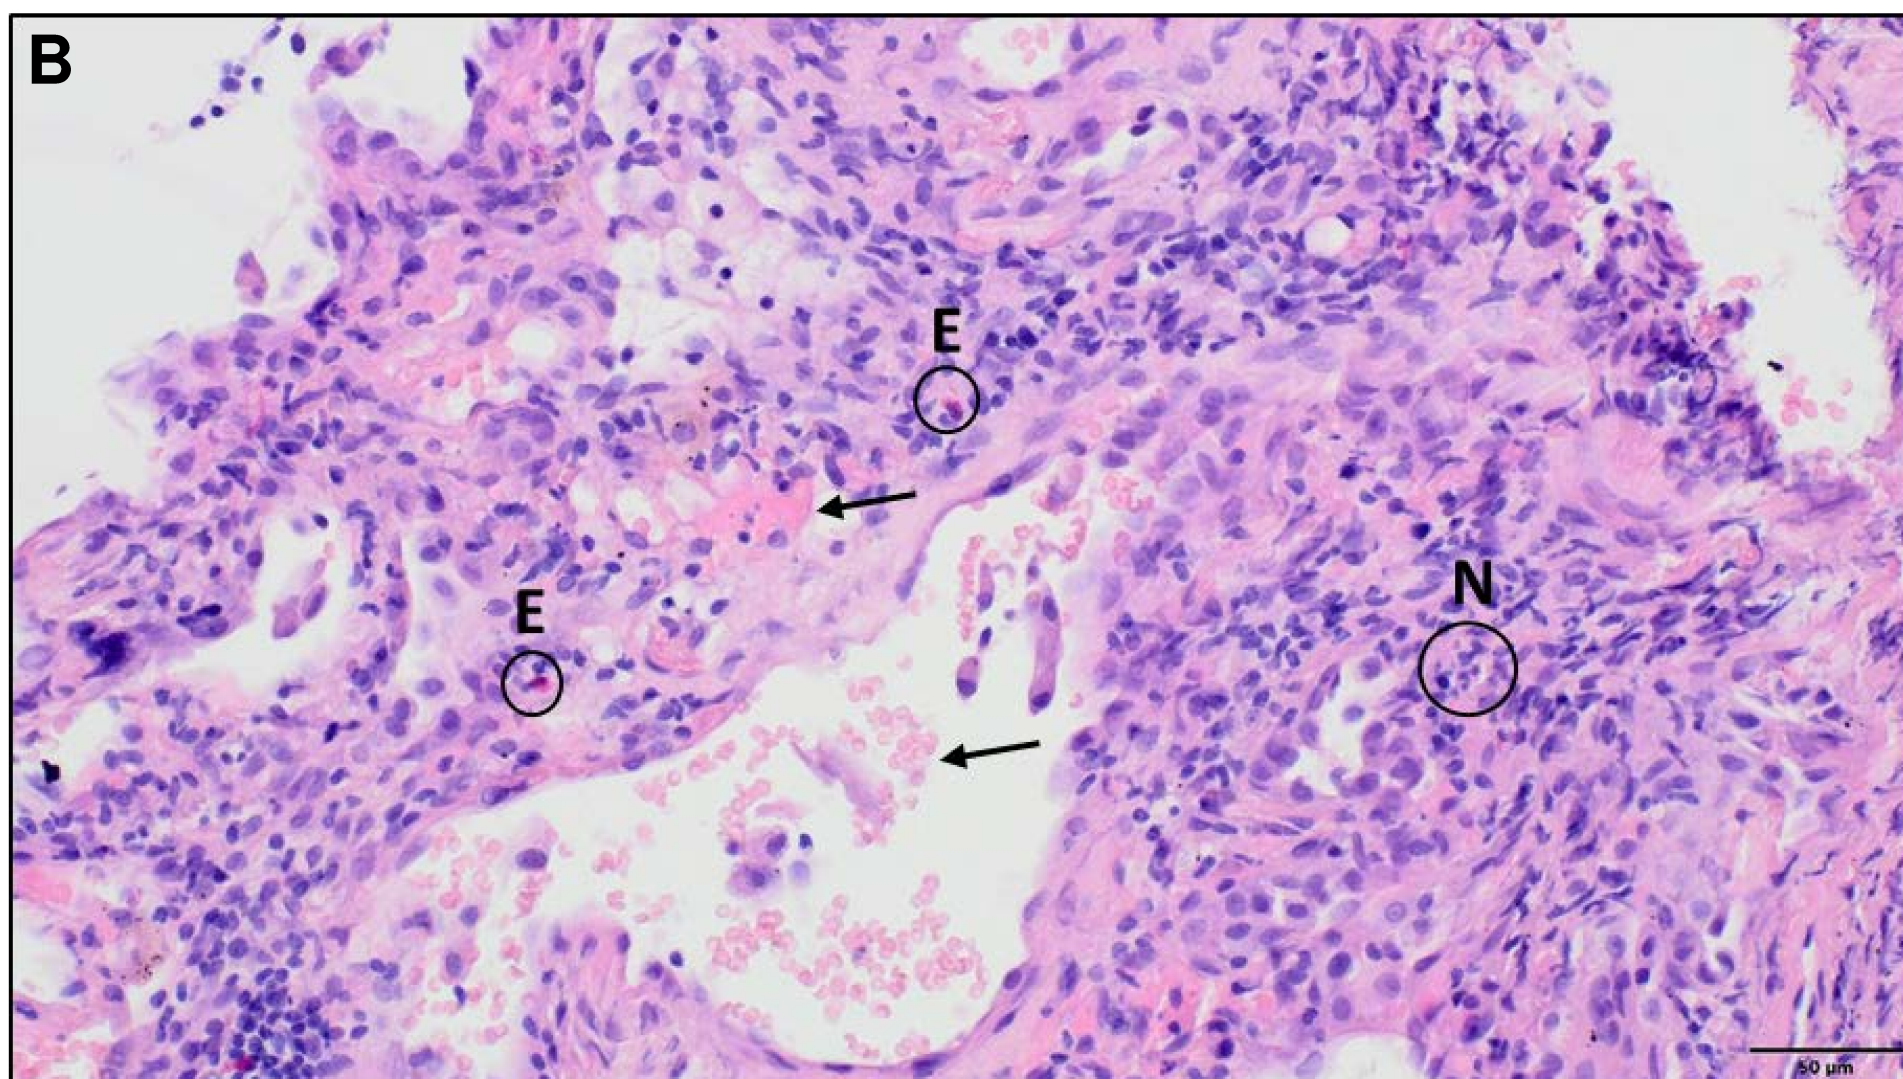

Supplement: inline-supplementary-material-4 [file inline-supplementary-material-4.pdf]
